# Supplementary material for: Facile Fabrication of Superwetting PVDF Membrane for Highly Efficient Oil/Water Separation
Source: MDPI journal article supplement (doi:10.3390/polym15020327), 2023-01-09
Supplement: s1 [file s1]

## Supplementary Materials

### Facial Strategy for Preparation of Modified PVDF Membrane: Endowing Effective Separation of Oil/Water Mixtures

Jinzhu Yang, Wei Sun, Junping Ju \*, Yeqiang Tan and Hua Yuan \*

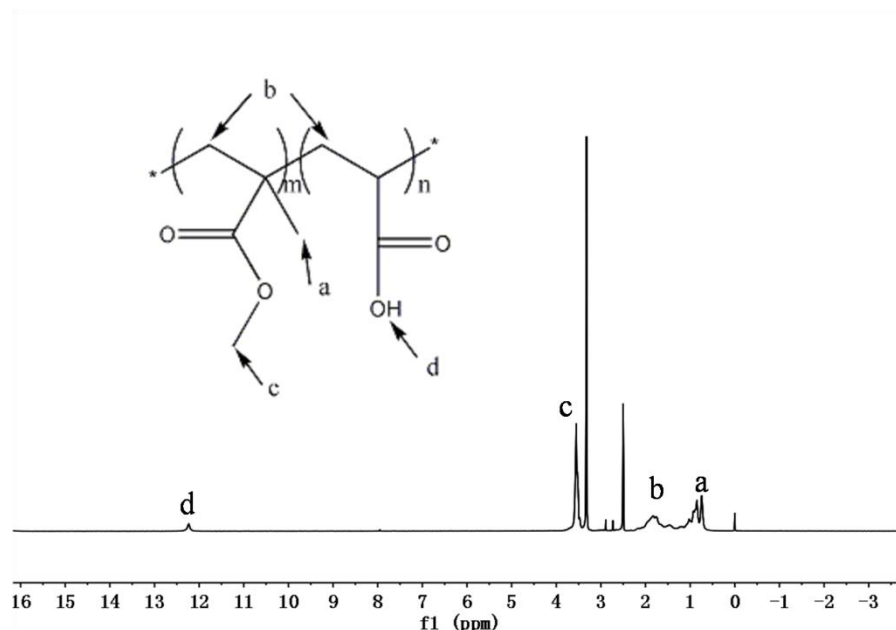

Figure S1.  $^1\text{H}$  NMR of P (MMA-AA) in  $d_6$ -DMSO.

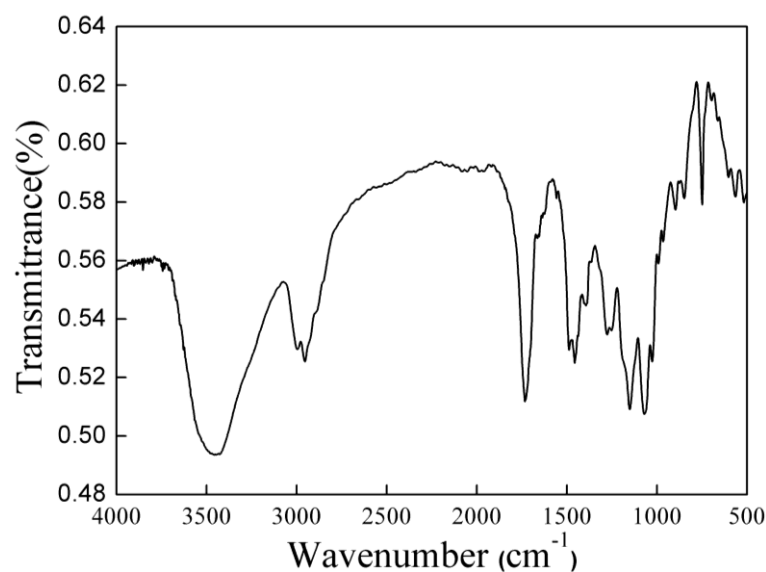

Figure S2. FTIR spectrum of the copolymer P (MMA-AA).

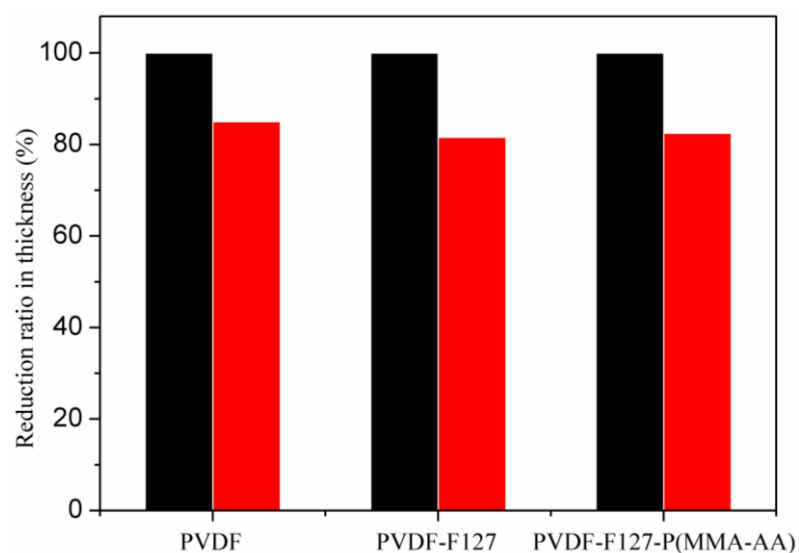

**Figure S3.** the thickness changes of PVDF, PVDF-F127, PVDF-F127-P (MMA-AA) membranes via heating treatment. ( membrane before heating treatment, membrane before heating treatment).

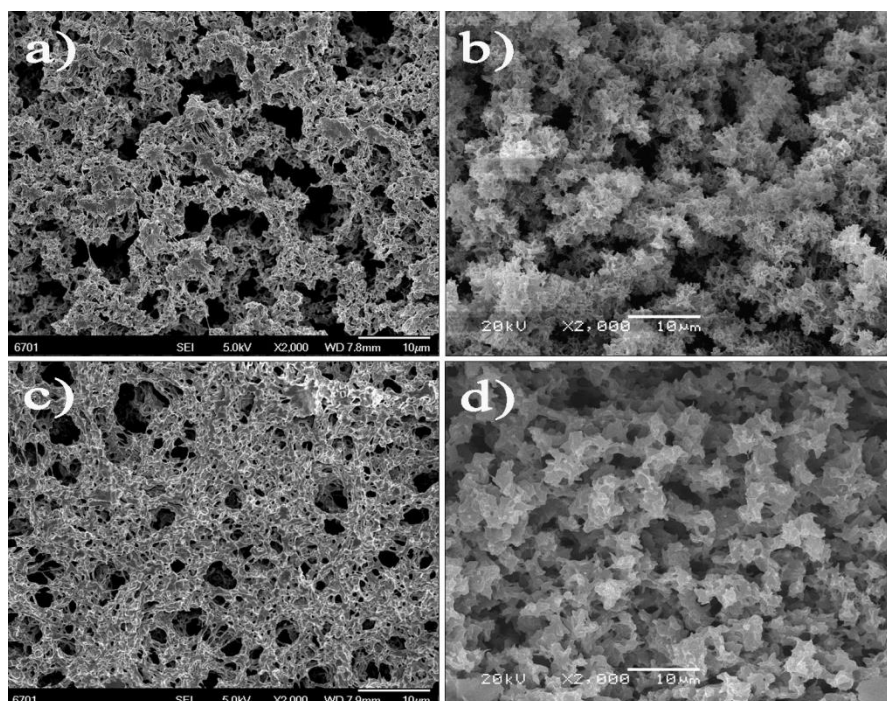

**Figure S4.** (a,b) surface and cross sectional structure images of the PVDF-F127 membrane. (c,d) surface and cross sectional structure images of the PVDF-F127 membrane after heating treatment.

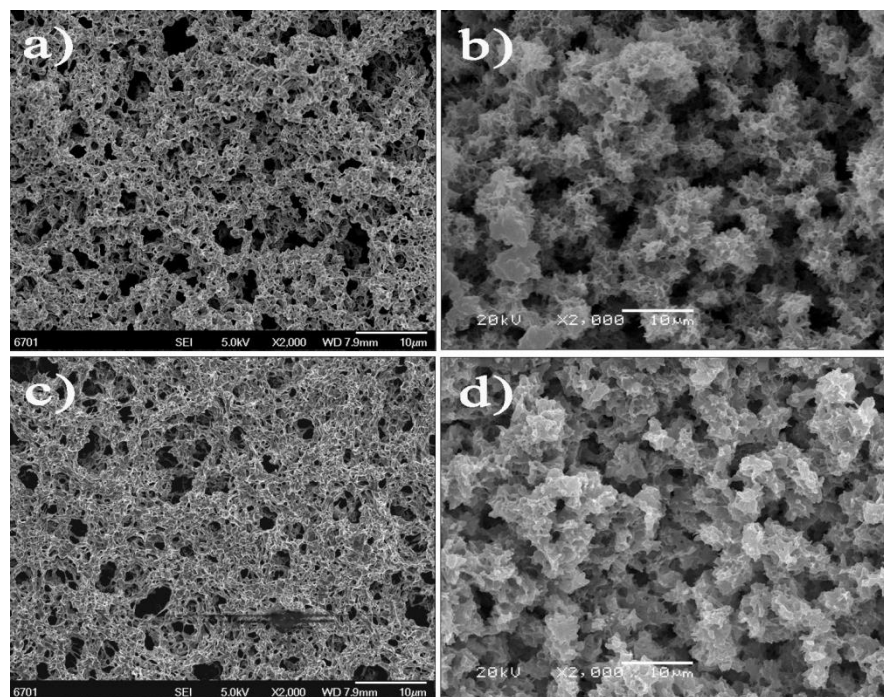

**Figure S5.** (a,b) surface and cross sectional structure images of the PVDF-F127-P (MMA-AA) membrane. (c,d) surface and cross sectional structure images of the PVDF-F127-P (MMA-AA) membrane after heating treatment.
